# Supplementary material
Source: HighWire-hosted journal article supplement (https://bjo.bmj.com/content/bjophthalmol-2018-312767)
Supplement: inline-supplementary-material-1 [file inline-supplementary-material-1.docx]

**Suppl. Table 1 Patient disease characteristics at baseline**

| **Patient** | **Age (years)** | **Duration of ocular inflammatory disease up to index date (years)** | **Aetiology (activity of underlying disease)** | **Duration of systemic inflammation (years)** | **Anatomic Classification of Uveitis** | **Uveitis phenotype** | **Co-morbidities** | **Smoking status** | **Visual acuity at baseline** | **Vitreous haze score** | **Indication for starting biologic therapy** | **Unilateral or bilateral disease** | **Duration of biologic therapy (years)** | **Immunosuppressive therapy at baseline** |
| --- | --- | --- | --- | --- | --- | --- | --- | --- | --- | --- | --- | --- | --- | --- |
| 1 | 32 | 3 | Behcet’s disease (active) | 4 | Posterior uveitis | Retinal vasculitis (macula-involving) | None | Current smoker | RE 0, LE 0 | RE 0, LE 0 | Intolerance to other immunosuppression | Missing | 10 | Prednisolone 20mg  Tacrolimus 2mg  Mycophenolate 1.5g |
| 2 | 38 | 5 | Anklylosing spondylosis (active) | 9 | Anterior uveitis | Anterior inflammation | Epiretinal membrane | Ex-smoker | RE 0.3, LE 0.5 | RE 0, LE 0 | Intolerance to other immunosuppression | Unilateral (RE) | 8 | Methotrexate 10mg |
| 3 | 45 | 10 | Idiopathic | Not applicable | Posterior uveitis | Retinal vasculitis (occlusive, macula-involving) | Epiretinal membrane | Ex-smoker | RE 0.5, LE 0 | RE 0, LE 0 | Failure to control inflammation  Early aggressive sight loss | Bilateral | 7 | Prednisolone 10mg Tacrolimus 4mg  Mycophenolate 2g |
| 4 | 26 | 3 | Behcet’s disease (active) | 4 | Posterior uveitis | Retinal vasculitis (occlusive, peripheral) | None | Never smoked | RE -0.2, LE -0.2 | RE 0, LE 0 | Failure to control inflammation | Bilateral | 9 | Prednisolone 25mg  Tacrolimus 6mg  Mycophenolate 2g |
| 5 | 38 | 1 | Behcet’s disease (active) | 0 | Panuveitis | Retinal vasculitis (macula-involving) | None | Current smoker | RE 0.5, LE 0 | RE 0, LE 0 | Intolerance to other immunosuppression | Bilateral | 11 | Prednisolone 15mg  Tacrolimus 2mg |
| 6 | 43 | 5 | Behcet’s disease (active) | 1 | Posterior uveitis | Retinal vasculitis (occlusive, peripheral) | Epiretinal membrane | Ex-smoker | RE -0.1, LE 0.5 | RE 0, LE 0 | Failure to control inflammation | Missing | 3 | Prednisolone 20mg  Tacrolimus 4mg  Mycophenolate 2g |
| 7 | 52 | 7 | Psoriatic arthropathy (active) | 16 | Intermediate uveitis | None | Glaucoma  Cataract | Never smoked | RE 0.7, LE 0.2 | RE 3, LE 0 | Failure to control inflammation | Bilateral | 9 | Methotrexate 20mg |
| 8 | 47 | 2 | Behcet’s disease (active) | 1 | Posterior uveitis | Retinal vasculitis (occlusive, peripheral) | Glaucoma | Never smoked | RE 1.3, LE 0.2 | RE 0, LE 0 | Intolerance to other immunosuppression | Bilateral | 10 | Prednisolone 20mg  Tacrolimus 2mg |
| 9 | 62 | 1 | Undifferentiated arthritis (active) | 2 | Scleritis | None | None | Ex-smoker | RE 1.5, LE 0.8 | RE 0, LE 0 | Failure to control inflammation | Bilateral | 10 | Methotrexate 20mg |
| 10 | 41 | 4 | Idiopathic | Not applicable | Posterior uveitis | Retinal vasculitis (occlusive, peripheral)  Vitritis | Cystoid macular oedema | Current smoker | RE 0, LE 0.3 | RE 0, LE 0 | Failure to control inflammation | Bilateral | 9 | Prednisolone 15mg  Cyclosporine 300mg |
| 11 | 25 | 3 | Behcet’s disease (active) | 3 | Posterior uveitis | Retinal vasculitis (peripheral) | Epiretinal membrane | Missing | RE 0, LE 0 | RE 0, LE 0 | Failure to control inflammation | Bilateral | 8 | Tacrolimus 6mg  Mycophenolate 3g |
| 12 | 24 | 6 | Idiopathic | Not applicable | Panuveitis | Retinal vasculitis (peripheral) | Cataract | Missing | RE 0.2, LE 0.2 | RE 1, LE 2 | Failure to control inflammation  Intolerance to other immunosuppression | Missing | 10 | Prednisolone 40mg  Methotrexate 20mg |
| 13 | 47 | 10 | Idiopathic | Not applicable | Posterior uveitis | None | Cystoid macular oedema  Epiretinal membrane | Ex-smoker | RE 0.8, LE 1 | RE 0, LE 0 | Failure to control inflammation | Bilateral | 7 | Prednisolone 15mg  Tacrolimus 5mg |
| 14 | 51 | 10 | Idiopathic | Not applicable | Posterior uveitis | Retinal vasculitis (occlusive, macula-involving) | Choroidal neovascularisation | Missing | RE 0.8, LE 0.8 | RE 0, LE 0 | Failure to control inflammation | Missing | 1 | Prednisolone 8mg  Tacrolimus 6mg  Mycophenolate 2g |
| 15 | 40 | 9 | Behcet’s disease (active) | 10 | Panuveitis | Retinal vasculitis (macula-involving) | Epiretinal membrane  Cystoid macular oedema | Current smoker | RE 0.8, LE 1.5 | RE 1, LE 1 | Failure to control inflammation  Intolerance to other immunosuppression | Bilateral | 12 | Prednisolone 30mg  Cyclosporine 150mg  Mycophenolate 3g |
| 16 | 29 | 2 | Idiopathic | Not applicable | Posterior uveitis | Missing | Missing | Missing | Missing | Missing | Missing | Missing | 5 | Prednisolone 8mg  Tacrolimus 4mg  Mycophenolate 2g |
| 17 | 33 | 3 | Idiopathic | Not applicable | Posterior uveitis | Retinal vasculitis (occlusive, macula-involving) | None | Current smoker | RE 0.2, LE 0 | RE 0, LE 0 | Early aggressive sight loss | Bilateral | 3 | Prednisolone 60mg  Tacrolimus 3mg  Mycophenolate 2g |
| 18 | 18 | 10 | JIA (active) | 15 | Anterior uveitis | None | None | Never smoked | RE 0, LE -0.1 | RE 0, LE 0 | Missing | Bilateral | 7 | Prednisolone 10mg  Mycophenolate 2g  Methotrexate 17.5mg |
| 19 | 53 | 1 | Behcet’s disease (active) | 7 | Posterior uveitis | Retinal vasculitis (peripheral) | Cataract  Epiretinal membrane | Missing | RE 0.2, LE 0.3 | RE 0, LE 0 | Intolerance to other immunosuppression | Bilateral | 7 | Prednisolone 10mg  Tacrolimus 4mg  Mycophenolate 2g |
| 20 | 31 | 18 | JIA (active) | 20 | Intermediate uveitis | Anterior inflammation | Glaucoma  Cataract | Never smoked | RE 0.5, LE 3 | RE 0, LE 0 | Failure to control inflammation | Bilateral | 7 | Prednisolone 30mg  Mycophenolate 3g  Methotrexate 25mg |
| 21 | 22 | 13 | Idiopathic | Not applicable | Intermediate uveitis | Retinal vasculitis (macula-involving) | Ocular hypertension  Cataract  Cystoid macular oedema | Never smoked | RE 0.2, LE 0.2 | RE 0, LE 0 | Failure to control inflammation  Intolerance to other immunosuppression | Bilateral | 9 | Cyclosporine 150mg  Mycophenolate 1.5g |
| 22 | 34 | 1 | Behcet’s disease (active) | 1 | Panuveitis | Anterior inflammation  Vitritis  Retinal vasculitis (peripheral) | Epiretinal membrane | Missing | RE 0.1, LE 0.1 | RE 0, LE 0 | Early aggressive sight loss | Unilateral (LE) | 7 | Prednisolone 5mg  Tacrolimus 4mg  Mycophenolate 2g |
| 23 | 52 | 10 | Idiopathic | Missing | Intermediate uveitis | Vitritis | Cataract  Epiretinal membrane  Cystoid macular oedema | Never smoked | RE 0.6, LE 0.2 | RE 0, LE 0 | Failure to control inflammation | Bilateral | 7 | Prednisolone 20mg  Tacrolimus 4mg  Mycophenolate 3g |
| 24 | 58 | 1 | ANCA negative vasculitis - active | 1 | Scleritis | None | None | Missing | RE 0, LE 0 | RE 0, LE 0 | Failure to control inflammation | Bilateral | 8 | Prednisolone 25mg  Azathioprine 100mg |
| 25 | 20 | 7 | Idiopathic | Not applicable | Intermediate uveitis | Vitritis | Glaucoma | Never smoked | RE 0, LE 0.6 | RE 0, LE 0 | Failure to control inflammation | Bilateral | 9 | Prednisolone 7.5mg  Tacrolimus 4mg  Mycophenolate 2g |
| 26 | 44 | 2 | Behcet’s disease (active) | 0 | Panuveitis | Retinal vasculitis (occlusive, macula-involving)  Vitritis  Anterior inflammation | Cystoid macular oedema | Never smoked | RE 2, LE 3 | RE 0, LE 4 | Intolerance to other immunosuppression  Early aggressive sight loss | Alternating disease | 6 | Prednisolone 30mg  Tacrolimus 2mg  Mycophenolate 1g |
| 27 | 28 | 2 | Idiopathic - mouth ulceration | 2 | Intermediate uveitis | Vitritis | Cystoid macular oedema | Ex-smoker | RE 0.1, LE 0.1 | RE 1, LE 1 | Failure to control inflammation | Bilateral | 5 | Tacrolimus 4mg  Mycophenolate 3g |
| 28 | 38 | 1 | Idiopathic | Not applicable | Posterior uveitis | Retinal vasculitis (occlusive, peripheral) | Cystoid macular oedema | Current smoker | RE 0.48, LE 0.3 | RE 0, LE 0 | Failure to control inflammation  Early aggressive sight loss | Bilateral | 6 | Tacrolimus 2mg  Mycophenolate 1g |
| 29 | 40 | 3 | Behcet’s disease (active) | 3 | Panuveitis | Retinal vasculitis (peripheral) | None | Current smoker | RE 2.5, LE 2.5 | RE 0, LE 0 | Failure to control inflammation  High dose steroid requirement | Bilateral | 9 | Prednisolone 50mg  Cyclosporine 300mg |
| 30 | 41 | 0 | Psoriatic arthropathy (active) | 6 | Scleritis | None | None | Never smoked | RE 0.2, LE 0.2 | RE 0, LE 0 | Early aggressive sight loss | Unilateral (RE) | 6 | Prednisolone 20mg  Methotrexate 20mg |
| 31 | 41 | 0 | Idiopathic | Not applicable | Posterior uveitis | Retinal vasculitis (occlusive, peripheral) | None | Ex-smoker | RE 1, LE -0.1 | RE 0.5, LE 0.5 | Early aggressive sight loss | Bilateral | 6 | Prednisolone 5mg  Mycophenolate 2g  Methotrexate 12.5mg |
| 32 | 32 | 8 | Idiopathic | Not applicable | Intermediate uveitis | Anterior inflammation  Vitritis | Glaucoma  Cataract  Epiretinal membrane  Cystoid macular oedema | Missing | Missing | RE 0, LE 0 | Failure to control inflammation | Bilateral | 1 | Prednisolone 10mg  Tacrolimus 2mg  Mycophenolate 3g |
| 33 | 47 | 1 | Behcet’s disease (active) | 1 | Anterior uveitis | Anterior inflammation | None | Never smoked | RE 0.15, LE 0.15 | RE 0, LE 0 | Failure to control inflammation | Bilateral | 8 | Prednisolone 10mg  Methotrexate 20mg |
| 34 | 20 | 8 | Juvenile sarcoidosis (active) | 8 | Panuveitis | Anterior inflammation  Vitritis | Cataract  Hypotony  Optic disc swelling  Optic atrophy | Never smoked | RE 0.3, LE 1 | RE 0, LE 0 | Failure to control inflammation | Bilateral | 6 | Prednisolone 20mg  Methotrexate 20mg |
| 35 | 32 | 0 | Behcet’s disease (active) | 3 | Posterior uveitis | Retinal vasculitis (macula-involving) | None | Current smoker | RE 0, LE 1.25 | RE 0, LE 0 | Intolerance to other immunosuppression  Early aggressive sight loss | Unilateral (LE) | 3 | Prednisolone 20mg  Tacrolimus 2mg |
| 36 | 23 | 6 | Idiopathic - no systemic disease | Not applicable | Panuveitis | Vitritis | Glaucoma  Cataract  Epiretinal membrane | Missing | RE 0.6, LE 0.3 | RE 1, LE 1 | Failure to control inflammation | Bilateral | 5 | Tacrolimus 2mg  Mycophenolate 2g |
| 37 | 47 | 1 | Idiopathic – CNS involvement | 1 | Panuveitis | Retinal vasculitis (peripheral)  Choroidal inflammation | None | Never smoked | RE 0.9, LE 0.7 | RE 0.5, LE 0.5 | Failure to control inflammation | Bilateral | 4 | Tacrolimus 3mg  Mycophenolate 2g |
| 38 | 54 | 0 | Idiopathic | Not applicable | Scleritis | None | Cataract | Never smoked | RE 0.1, LE 0.8 | RE 0, LE 0 | Intolerance to other immunosuppression | Unilateral | 5 | Prednisolone 10mg  Methotrexate 15mg |
| 39 | 45 | 4 | Behcet’s disease (active) | Missing | Panuveitis | Retinal vasculitis (peripheral) | Epiretinal membrane  Cystoid macular oedema | Never smoked | RE -0.1, LE -0.1 | RE 0, LE 0 | Failure to control inflammation  High dose steroid requirement | Bilateral | 5 | Prednisolone 7.5mg  Tacrolimus 4mg  Mycophenolate 3g |
| 40 | 51 | 5 | Sarcoidosis (active) | 5 | Panuveitis | Anterior inflammation  Vitritis | Ocular hypertension  Cataract  Epiretinal membrane  Cystoid macular oedema | Missing | RE 0.7, LE 0.2 | RE 1, LE 0.5 | Failure to control inflammation | Bilateral | 4 | Prednisolone 15mg  Tacrolimus 3mg  Mycophenolate 3g |
| 41 | 57 | 3 | Behcet’s disease - (active) | 0 | Panuveitis | Retinal vasculitis (occlusive, peripheral)  Vitritis | Cataract  Cystoid macular oedema | Never smoked | RE 2, LE 0.9 | RE 1, LE 0 | Failure to control inflammation | Bilateral | 3 | Tacrolimus 4mg  Mycophenolate 3g |
| 42 | 52 | Missing | Idiopathic | Not applicable | Missing | Missing | Epiretinal membrane  Cystoid macular oedema | Missing | RE 0.6, LE 0.6 | RE 0, LE 0 | Intolerance to other immunosuppression | Missing | 3 | Prednisolone 7.5mg |
| 43 | 18 | 8 | Idiopathic | Not applicable | Intermediate uveitis | Vitritis | Epiretinal membrane  Cystoid macular oedema | Missing | RE 0.6, LE 0.7 | RE 1, LE 1 | Intolerance to other immunosuppression | Bilateral | 3 | None |

## **Suppl. Table 2**

## **Comparison of Immunomodulatory treatment, oral corticosteroids and topical treatments prior to commencement of TNFi (baseline visit) and during TNFi therapy**

| **Medication** | Prior to TNFi | % | Concomitant with TNFi | % |
| --- | --- | --- | --- | --- |
| Prednisolone >10mg PO/day | 22 | 51.1 | 6 | 14 |
| Prednisolone 1-10mg PO/day | 18 | 41.8 | 23 | 53.5 |
| Prednisolone 0mg |  |  | 15 |  |
| 1 immunomodulatory medications* | 15 | 37.2 | 25 | 58.1 |
| 2 immunomodulatory medications * | 25 | 58.1 | 11 | 25.6 |
| Topical Steroid | 17 | 38.6 | 7 | 16.3 |
| Topical Antihypertensive Medication | 9 | 20.5 | 11 | 25.6 |

## **Suppl. Table 2: Comparison of Immunomodulatory treatment, oral corticosteroids and topical treatments prior to commencement of TNFi (baseline visit) and during TNFi therapy**

| Medication | Prior to TNFi | % | Concomitant with TNFi | % |
| --- | --- | --- | --- | --- |
| Prednisolone >10mg PO/day | 22 | 51 | 6 | 14 |
| Prednisolone 1-10mg PO/day | 18 | 42 | 23 | 53.5 |
| Prednisolone 0mg | 4 | 9 | 15 | 39 |
| 1 immunomodulatory medications* | 15 | 37 | 25 | 58.1 |
| 2 immunomodulatory medications * | 25 | 58 | 11 | 25.6 |
| Topical Steroid | 17 | 39 | 7 | 16.3 |
| Topical Antihypertensive Medication | 9 | 21 | 11 | 25.6 |

**Suppl. Table 3 Baseline and census visual acuities in patients who lost vision.**

| Patient | Baseline VA | Visual Acuity at Census |
| --- | --- | --- |
| 5 | 0.0 | 1.00 |
| 8 | 0.2 | 2.00 |
| 13 | 0.8 | 1.60 |
| 15 | 0.8 | 1.26 |
| 18 | -0.1 | 0.30 |
| 27 | 0.1 | 0.10 |
| 29 | 2.5 | 3.00 |
| 34 | 0.3 | 0.70 |
| 36 | 0.3 | 0.6 |
